# Supplementary material
Source: publisher site journal article supplement (https://www.dovepress.com/article/301589)
Supplement: Supplementary file 1 [file get_supplementary_file.php]

APPENDIX

Table A1. Incremental costs, QALYs and ICURs from the healthcare payer/provider and the societal perspective

| **Estimation number** |  | **Healthcare payer/provider perspective** | | | | | **Societal perspective** | | | | | **Perspectives comparison** | | **Threshold value** | |
| --- | --- | --- | --- | --- | --- | --- | --- | --- | --- | --- | --- | --- | --- | --- | --- |
| **Authors & publication year** | **∆Costs** | **∆QALYs** | **ICUR (Cost/QALY)** | **Authors´ conclusions** | **∆Costs** | | **∆QALYs** | **ICUR (Cost/QALY)** | **Authors´ conclusions** | **Do the conclusions change? (YES/NO)** | |  | |
| 1 | Broekhuizen et al (2018) 32 | -1,057 | 0.02 | -52,850 | The intervention dominates usual care | -1,627 | | 0.02 | -91,254 | The intervention dominates usual care | NO | | €10,000-24,400 | |
| 2 | Broekhuizen et al (2018) 32 | -23 | -0.003 | 7,667 | The intervention is more cost-effective than usual care | 653 | | -0.003 | -241,959 | The intervention is dominated by usual care | YES | | €10,000-24,400 | |
| 3 | Broekhuizen et al (2018) 32 | -446 | -0.008 | 55,750 | The intervention is less cost-effective than usual care | -1,155 | | -0.008 | 146,179 | The intervention is less cost-effective than usual care | NO | | €10,000-24,400 | |
| 4 | de Wit et al. (2018) 34 | -197 | -0.0008 | 247,388 | The intervention is less cost-effective than usual care | 708 | | -0.0008 | -888,936 | HypoAware is dominated by usual care | NO, but when social costs are included, the intervention is dominated | | €20,000 | |
| 5 | de Wit et al. (2018) 34 | -197 | -0.001 | 23,130 | The intervention is less cost-effective than usual care | 708 | | -0.001 | -83,112 | The intervention is dominated by usual care | NO, but when social costs are included, the intervention is dominated | | €20,000 | |
| 6 | Ericsson et al (2018) 35 | 28,028 | 0.86 | 32,591 | The intervention is more cost-effective than the comparator | 26,414 | | 0.86 | 30,714 | The intervention is more cost-effective than the comparator | NO | | SEKs 100,000-500,000 | |
| 7 | Breeze et al (2017) 31 | -4.8 | 0.0003 | -16,000 | The intervention dominates doing nothing | -4.92 | | 0.0003 | -16,400 | The intervention dominates doing nothing | NO | | £20,000 | |
| 8 | Breeze et al (2017) 31 | -3.35 | 0.0004 | -8,375 | The intervention dominates doing nothing | -3.4 | | 0.0004 | -8,500 | The intervention dominates doing nothing | NO | | £20,000 | |
| 9 | Breeze et al (2017) 31 | -0.56 | 0.0001 | -5,600 | The intervention dominates doing nothing | -0.59 | | 0.0001 | -5,900 | The intervention dominates doing nothing | NO | | £20,000 | |
| 10 | Breeze et al (2017) 31 | 0 | 0.0001 | 0 | The intervention is more cost-effective than doing nothing | -0.02 | | 0.0001 | -200 | The intervention dominates doing nothing | NO, but when social costs are included, the intervention becomes cost-saving | | £20,000 | |
| 11 | Breeze et al (2017) 31 | -23.85 | 0.0007 | -34,071 | The intervention dominates doing nothing | -23.42 | | 0.0007 | -33,457 | The intervention dominates doing nothing | NO | | £20,000 | |
| 12 | Breeze et al (2017) 31 | -4.8 | 0.0003 | -16,000 | The intervention dominates doing nothing | -4.91 | | 0.0003 | -16,367 | The intervention dominates doing nothing | NO | | £20,000 | |
| 13 | Breeze et al (2017) 31 | -3.35 | 0.0004 | -8,375 | The intervention dominates doing nothing | -3.37 | | 0.0004 | -8,425 | The intervention dominates doing nothing | NO | | £20,000 | |
| 14 | Breeze et al (2017) 31 | -0.56 | 0.0001 | -5,600 | The intervention dominates doing nothing | -0.57 | | 0.0001 | -5,700 | The intervention dominates doing nothing | NO | | £20,000 | |
| 15 | Breeze et al (2017) 31 | 0 | 0.0001 | 0 | The intervention is more cost-effective than doing nothing | -0,01 | | 0.0001 | -100 | The intervention dominates doing nothing | NO, but when social costs are included, the intervention becomes cost-saving | | £20,000 | |
| 16 | Breeze et al (2017) 31 | -23.85 | 0.0007 | -34,071 | The intervention dominates doing nothing | -23.9 | | 0.0007 | -34,143 | The intervention dominates doing nothing | NO | | £20,000 | |
| 17 | Jendel et al. (2017) 40 | 373,896 | 1.88 | 198,881 | The intervention is more cost-effective than the comparator | 262,396 | | 1.88 | 139,572 | The intervention is more cost-effective than the comparator | NO | | SEKs 300,000 | |
| 18 | Jendel et al. (2017) 40 | 350,484 | 1.067 | 328,476 | The intervention is more cost-effective than the comparator | 268,899 | | 1.067 | 252,014 | The intervention is more cost-effective than the comparator | YES | | SEKs 300,000 | |
| 19 | Landstedt-Hallin et al. (2017) 44 | -22,757 | 0.54 | -42,143 | The intervention dominates the comparator | -39,152 | | 0.54 | -72,504 | The intervention dominates the comparator | NO | | Not determined | |
| 20 | Landstedt-Hallin et al. (2017) 44 | -22,757 | 0.92 | -24,736 | The intervention dominates the comparator | -39,152 | | 0.92 | -42,557 | The intervention dominates the comparator | NO | | Not determined | |
| 21 | Landstedt-Hallin et al. (2017) 44 | -19,075 | 0.24 | -79,479 | The intervention dominates the comparator | -29,456 | | 0.24 | -122,733 | The intervention dominates the comparator | NO | | Not determined | |
| 22 | Landstedt-Hallin et al. (2017) 44 | -34,606 | 0.81 | -42,723 | The intervention dominates the comparator | -48,892 | | 0.81 | -60,360 | The intervention dominates the comparator | NO | | Not determined | |
| 23 | Landstedt-Hallin et al. (2017) 44 | -33,890 | 0.45 | -75,311 | The intervention dominates the comparator | -62,451 | | 0.45 | -138,780 | The intervention dominates the comparator | NO | | Not determined | |
| 24 | Roze et al. (2017) 49 | 305,638 | 1.45 | 210,785 | The intervention is more cost-effective than the comparator | 226,023 | | 1.45 | 155,878 | The intervention is more cost-effective than the comparator | NO | | DKK 225,000 | |
| 25 | Roze et al. (2017) 49 | 227,793 | 1.88 | 121,167 | The intervention is more cost-effective than the comparator | 168,682 | | 1.88 | 89,725 | The intervention is more cost-effective than the comparator | NO | | DKK 225,000 | |
| 26 | Slangen et al. (2017) 55 | 16,569 | 0.22 | 75,314 | The intervention is more cost-effective than the comparator | 21,226 | | 0.22 | 96,481 | The intervention is less cost-effective than the comparator | YES | | €80,000 | |
| 27 | Farshchi et al. (2016) 73 | -136 | 0.08 | -169 | The intervention dominates the comparator | -171 | | 0.08 | -2,134 | The intervention dominates the comparator | NO | | $20,000 | |
| 28 | Haig et al. (2016) 66 | 9,849 | 0.4 | 24,494 | The intervention is more cost-effective than the comparator | -18,993 | | 0.4 | -47,483 | The intervention dominates the comparator | NO, but when social costs are included, the intervention becomes cost-saving | | CAN$ 50,000 | |
| 29 | Haig et al. (2016) 66 | 11,471 | 0.32 | 36,414 | The intervention is more cost-effective than the comparator | -11,114 | | 0.32 | -34,731 | The intervention dominates the comparator | NO, but when social costs are included, the intervention becomes cost-saving | | CAN$ 50,000 | |
| 30 | Kolu et al. (2016) 43 | -221 | 0.24 | -921 | The intervention dominates the comparator | -1,300 | | 0.24 | -5,417 | The intervention dominates the comparator | NO | | Not determined | |
| 31 | Lian et al (2016) 74 | 598,537 | 1.25 | 478,830 | The intervention is less cost-effective than the comparator | 249,676 | | 1.25 | 199,741 | The intervention is less cost-effective than the comparator | NO | | Not determined | |
| 32 | Lian et al (2016) 74 | 1,213,042 | 7.28 | 166,627 | The intervention is less cost-effective than the comparator | 1,048,655 | | 7.28 | 144,046 | The intervention is less cost-effective than the comparator | NO | | Not determined | |
| 33 | Nguyen et al. (2016) 75 | -144 | 0 | - | The intervention dominates the comparator | -173 | | 0 | - | The intervention dominates the comparator | NO | | Singapore S$ 63,000 | |
| 34 | Roussel et al (2016) 48 | 2,558 | 0.25 | 10,275 | The intervention is more cost-effective than the comparator | 2,289 | | 0.25 | 9,197 | The intervention is less cost-effective than the comparator | NO | | €30,000 | |
| 35 | Roussel et al (2016) 48 | 4,695 | 0.23 | 20,709 | The intervention is more cost-effective than the comparator | 4,417 | | 0.23 | 19,482 | The intervention is more cost-effective than the comparator | NO | | €30,000 | |
| 36 | Roze et al. (2016) 53 | 36,568 | 2.99 | 12,233 | The intervention is more cost-effective than the comparator | 10,042 | | 2.99 | 3,359 | The intervention is more cost-effective than the comparator | NO | | £20,000 – 30,000 | |
| 37 | Roze et al. (2016) 52 | 35,801 | 1.187 | 30,163 | The intervention is less cost-effective than the comparator | 31,884 | | 1.187 | 26,863 | The intervention is more cost-effective than the comparator | YES | | €30,000 | |
| 38 | Roze et al. (2016) 50 | 27,051 | 0.43 | 62,909 | The intervention is more cost-effective than the comparator | 26,010 | | 0.43 | 60,488 | The intervention is more cost-effective than the comparator | NO | | €80,000 | |
| 39 | Brown et al. (2015) 61 | 56,366 | 0.9981 | 56,445 | The intervention is more cost-effective than the comparator for threshold values > $56,500 | -30,807 | | 0.9981 | -30,866 | The intervention dominates the comparator | NO, but when social costs are included, the intervention becomes cost-saving | | $50,000 – 100,000 | |
| 40 | Cutino et al (2015) 62 | 18,880 | 0.1288 | 146,584 | The intervention is less cost-effective than the comparator | 5,015 | | 0.1288 | 38,948 | The intervention is more cost-effective than the comparator | YES | | $50000 | |
| 41 | Cutino et al (2015) 62 | 13,548 | 0.1288 | 105,186 | The intervention is less cost-effective than the comparator | -1,367 | | 0.1288 | -10,613 | The intervention dominates the comparator | YES | | $50000 | |
| 42 | Cutino et al (2015) 62 | 26,034 | 0.1288 | 202,127 | The intervention is less cost-effective than the comparator | 11,119 | | 0.1288 | 86,328 | The intervention is more cost-effective than the comparator | NO | | $50000 | |
| 43 | Huetson et al (2015) 38 | -7,469 | 0.066 | -113,167 | The intervention dominates the comparator | -6,869 | | 0.066 | -104,076 | The intervention dominates the comparator | NO | | NOKs 500,000 | |
| 44 | Roze et al (2015) 51 | 415,106 | 0.76 | 545,005 | The intervention is less cost-effective than the comparator | 279,962 | | 0.76 | 367,571 | The intervention is more cost-effective than the comparator | YES | | SEKs 500,000 | |
| 45 | Kiadaliri (2014) 42 | 31,510 | 0.1 | 315,100 | The intervention is more cost-effective than the comparator | 34,865 | | 0.1 | 348,650 | The intervention is more cost-effective than the comparator | NO | | SEKs 500,000 | |
| 46 | Kiadaliri (2014) 42 | 29,598 | 0.25 | 118,392 | The intervention is more cost-effective than the comparator | 40,802 | | 0.25 | 163,208 | The intervention is more cost-effective than the comparator | NO | | SEKs 500,000 | |
| 47 | Kiadaliri (2014) 42 | -1,912 | 0.15 | -12,747 | The intervention dominates the comparator | 5,936 | | 0.15 | 39,573 | The intervention is more cost-effective than the comparator | NO, but when social costs are included, the intervention is no longer costs-saving | | SEKs 500,000 | |
| 48 | Png et al (2014) 76 | 846 | 0.05 | 17,184 | The intervention is more cost-effective than the comparator | 1804 | | 0.05 | 36,663 | The intervention is more cost-effective than the comparator | NO | | $53,000 | |
| 49 | Png et al (2014) 76 | 846 | 0.05 | 17,184 | The intervention is more cost-effective than the comparator | 1802 | | 0.05 | 36,609 | The intervention is more cost-effective than the comparator | NO | | $53,000 | |
| 50 | Png et al (2014) 76 | 846 | 0.05 | 17,184 | The intervention is more cost-effective than the comparator | 1793 | | 0.05 | 36,440 | The intervention is more cost-effective than the comparator | NO | | $53,000 | |
| 51 | Png et al (2014) 76 | 281 | 0.01 | 21,065 | The intervention is more cost-effective than the comparator | -19,915 | | 0.01 | -1,991,500 | The intervention dominates the comparator | NO, but when social costs are included, the intervention becomes cost-saving | | $53,000 | |
| 52 | Png et al (2014) 76 | 281 | 0.01 | 21,065 | The intervention is more cost-effective than the comparator | 84 | | 0.01 | 8,400 | The intervention is more cost-effective than the comparator | NO | | $53,000 | |
| 53 | Png et al (2014) 76 | 281 | 0.01 | 21,065 | The intervention is more cost-effective than the comparator | 79 | | 0.01 | 7,900 | The intervention is more cost-effective than the comparator | NO | | $53,000 | |
| 54 | Steen-Carlsson & Persson (2014) 57 | 56,805 | 0.36 | 157,792 | The intervention is more cost-effective than the comparator | 80,358 | | 0.36 | 223,217 | The intervention is more cost-effective than the comparator | NO | | SEKs 500,000 | |
| 55 | Steen-Carlsson & Persson. (2014) 57 | 59,289 | 0.31 | 191,255 | The intervention is more cost-effective than the comparator | 77,234 | | 0.31 | 249,142 | The intervention is more cost-effective than the comparator | NO | | SEKs 500,000 | |
| 56 | Steen-Carlsson & Persson. (2014) 57 | 56,855 | 0.36 | 157,931 | The intervention is more cost-effective than the comparator | 82,452 | | 0.36 | 229,033 | The intervention is more cost-effective than the comparator | NO | | SEKs 500,000 | |
| 57 | Steen-Carlsson & Persson. (2014) 57 | 59,891 | 0.32 | 187,159 | The intervention is more cost-effective than the comparator | 80,566 | | 0.32 | 251,769 | The intervention is more cost-effective than the comparator | NO | | SEKs 500,000 | |
| 58 | Steen-Carlsson & Persson. (2014) 57 | 37,512 | 0.38 | 98,716 | The intervention is more cost-effective than the comparator | 56,624 | | 0.38 | 149,011 | The intervention is more cost-effective than the comparator | NO | | SEKs 500,000 | |
| 59 | Steen-Carlsson & Persson. (2014) 57 | 38,638 | 0.33 | 117,085 | The intervention is more cost-effective than the comparator | 51,898 | | 0.33 | 157,267 | The intervention is more cost-effective than the comparator | NO | | SEKs 500,000 | |
| 60 | Steen-Carlsson & Persson. (2014) 57 | 37,267 | 0.38 | 98,071 | The intervention is more cost-effective than the comparator | 57,603 | | 0.38 | 151,587 | The intervention is more cost-effective than the comparator | NO | | SEKs 500,000 | |
| 61 | Steen-Carlsson & Persson. (2014) 57 | 39,110 | 0.34 | 115,029 | The intervention is more cost-effective than the comparator | 54,411 | | 0.34 | 160,032 | The intervention is more cost-effective than the comparator | NO | | SEKs 500,000 | |
| 62 | Tsiachristas (2014) 58 | -677 | 0.013 | -52077 | The intervention dominates the comparator. | -1735 | | 0.013 | -133462 | The intervention dominates the comparator | NO | | Not determined | |
| 63 | Ericsson (2013) 36 | 905 | 0.044 | 20,562 | The intervention is more cost-effective than the comparator | 878 | | 0.044 | 19,766 | The intervention is more cost-effective than the comparator | NO | | SEKs 500,000 | |
| 64 | Ericsson (2013) 36 | 987 | 0.08 | 12,334 | The intervention is more cost-effective than the comparator | 802 | | 0.08 | 10,082 | The intervention is more cost-effective than the comparator | NO | | SEKs 500,000 | |
| 65 | Ericsson (2013) 36 | 4,035 | 0.09 | 44,831 | The intervention is more cost-effective than the comparator | 3,251 | | 0.09 | 36,074 | The intervention is more cost-effective than the comparator | NO | | SEKs 500,000 | |
| 66 | Saha (2013) 54 | 1,580 | 0.95 | 1,885 | The intervention is more cost-effective than the comparator | 9,800 | | 0.95 | 10,537 | The intervention is more cost-effective than the comparator | NO | | $76,000 | |
| 67 | Salas-Cansado (2012) 33 | 174 | 0.101 | 14,381 | The intervention is more cost-effective than the comparator | 151 | | 0.101 | 5,302 | The intervention is more cost-effective than the comparator | NO | | €30,000 | |
| 68 | Kamble et al (2012) 69 | 86,324 | 0.376 | 229,675 | The intervention is less cost-effective than the comparator | 79,678 | | 0.376 | 211,991 | The intervention is less cost-effective than the comparator | NO | | $100,000 | |
| 69 | Kamble et al (2012) 69 | 63,182 | 0.376 | 168,104 | The intervention is less cost-effective than the comparator | 56,536 | | 0.376 | 150,420 | The intervention is less cost-effective than the comparator | NO | | $100,000 | |
| 70 | Oostdam (2012) 46 | 842 | -0.005 | -168,400 | The intervention is dominated by the comparator | 986 | | -0.005 | -208,558 | The intervention is dominated by the comparator | NO | | Not determined | |
| 71 | Oostdam (2012) 46 | 842 | -0.005 | -168,400 | The intervention is dominated by the comparator | 1029 | | -0.005 | -217,602 | The intervention is dominated by the comparator | NO | | Not determined | |
| 72 | Smith-Palmer (2012) 56 | -5,677 | 0.11 | -51,609 | The intervention dominates the comparator | -23,217 | | 0.11 | -211,064 | The intervention dominates the comparator | NO | | Not determined | |
| 73 | Greeley et al. (2011) 64 | -7,677 | 0.32 | -23,991 | The intervention dominates the comparator | -12,528 | | 0.32 | -39,150 | The intervention dominates the comparator | NO | | $200,000 | |
| 74 | Greeley et al. (2011) 64 | -17,576 | 0.55 | -31,956 | The intervention dominates the comparator | -23,227 | | 0.55 | -42,231 | The intervention dominates the comparator | NO | | $200,000 | |
| 75 | Greeley et al. (2011) 64 | -24,789 | 0.7 | -35,413 | The intervention dominates the comparator | -30,437 | | 0.7 | -43,481 | The intervention dominates the comparator | NO | | $200,000 | |
| 76 | Kasteng et al. (2011) 41 | -13,221 | 0.08 | -165,263 | The intervention dominates the comparator | -10,079 | | 0.08 | -125,988 | The intervention dominates the comparator | NO | | SEKs 500,000 | |
| 77 | Kasteng et al. (2011) 41 | -9,207 | 0.09 | -102,300 | The intervention dominates the comparator | -12,087 | | 0.09 | -134,300 | The intervention dominates the comparator | NO | | SEKs 500,000 | |
| 78 | Kuo et al. (2011) 70 | 5,311 | 0.117 | 45,393 | The intervention is more cost-effective than the comparator | 4,909 | | 0.117 | 41,957 | The intervention is more cost-effective than the comparator | NO | | $50,000-100,000 | |
| 79 | Patel et al. (2011) 47 | 340 | 0.011 | 30,909 | The intervention is less cost-effective than the comparator | 449 | | 0.011 | 40,818 | The intervention is less cost-effective than the comparator | NO | | £20,000 – 30,000 | |
| 80 | Patel et al. (2011) 47 | 535 | 0.011 | 48,636 | The intervention is less cost-effective than the comparator | 643 | | 0.011 | 58,455 | The intervention is less cost-effective than the comparator | NO | | £20,000 – 30,000 | |
| 81 | Patel et al. (2011) 47 | 127 | 0.003 | 42,333 | The intervention is less cost-effective than the comparator | 149 | | 0.003 | 49,667 | The intervention is less cost-effective than the comparator | NO | | £20,000 – 30,000 | |
| 82 | Patel et al. (2011) 47 | 790 | 0.003 | 263,333 | The intervention is less cost-effective than the comparator | 814 | | 0.003 | 271,333 | The intervention is less cost-effective than the comparator | NO | | £20,000 – 30,000 | |
| 83 | Patel et al. (2011) 47 | -287 | -0.008 | 35,875 | The intervention is less cost-effective than the comparator | -323 | | -0.008 | 40,375 | The intervention is less cost-effective than the comparator | NO | | £20,000 – 30,000 | |
| 84 | Patel et al. (2011) 47 | 178 | -0.008 | -22,250 | The intervention is dominated by the comparator | 144 | | -0.008 | -18,000 | The intervention is dominated by the comparator | NO | | £20,000 – 30,000 | |
| 85 | Patel et al. (2011) 47 | 340 | 0.004 | 85,000 | The intervention is less cost-effective than the comparator | 449 | | 0.004 | 112,250 | The intervention is less cost-effective than the comparator | NO | | £20,000 – 30,000 | |
| 86 | Patel et al. (2011) 47 | 535 | 0.004 | 133,750 | The intervention is less cost-effective than the comparator | 643 | | 0.004 | 160,750 | The intervention is less cost-effective than the comparator | NO | | £20,000 – 30,000 | |
| 87 | Patel et al. (2011) 47 | 127 | 0.0002 | 635,000 | The intervention is less cost-effective than the comparator | 149 | | 0.0002 | 745,000 | The intervention is less cost-effective than the comparator | NO | | £20,000 – 30,000 | |
| 88 | Patel et al. (2011) 47 | 790 | 0.0002 | 3,950,000 | The intervention is less cost-effective than the comparator | 814 | | 0.0002 | 4,070,000 | The intervention is less cost-effective than the comparator | NO | | £20,000 – 30,000 | |
| 89 | Patel et al. (2011) 47 | -287 | -0.004 | 71,750 | The intervention is less cost-effective than the comparator | -323 | | -0.004 | 80,750 | The intervention is less cost-effective than the comparator | NO | | £20,000 – 30,000 | |
| 90 | Patel et al. (2011) 47 | 178 | -0.004 | -44,500 | The intervention is dominated by the comparator | 144 | | -0.004 | -36,000 | The intervention is dominated by the comparator | NO | | £20,000 – 30,000 | |
| 91 | Valentine et al. (2011) 60 | 1,023 | 0.15 | 6,820 | The intervention is more cost-effective than the comparator | -346 | | 0.15 | -2,307 | The intervention is more cost-effective than the comparator | NO, but when social costs are included, the intervention becomes cost-saving | | €40,000 – 60,000 | |
| 92 | Valentine et al. (2011) 59 | 26,144 | 0.53 | 49,328 | The intervention is more cost-effective than the comparator | -80,113 | | 0.53 | -151,157 | The intervention is more cost-effective than the comparator | NO, but when social costs are included, the intervention becomes cost-saving | | SEKs 100,000 – 400,000 | |
| 93 | Huang et al. (2010) 68 | 58,134 | 0.6 | 96,890 | The intervention is more cost-effective than the comparator for very high threshold values | 58,767 | | 0.6 | 97,945 | The intervention is more cost-effective than the comparator for very high threshold values | NO | | $50,000 – 100,000 | |
| 94 | Huang et al. (2010) 68 | 84,765 | 1.11 | 76,365 | The intervention is more cost-effective than the comparator for high threshold values | 87,386 | | 1.11 | 78,726 | The intervention is more cost-effective than the comparator for high threshold values | NO | | $50,000 – 100,000 | |
| 95 | Ismail et al (2010) 39 | 458 | 0.007 | 65,429 | The intervention is less cost-effective than the comparator | 550 | | 0.007 | 78,571 | The intervention is less cost-effective than the comparator | NO | | £20,000 | |
| 96 | Ismail et al (2010) 39 | 707 | -0.0001 | -7,070,000 | The intervention is dominated by the comparator | 718 | | -0.0001 | -7,180,000 | The intervention is dominated by the comparator | NO | | £20,000 | |
| 97 | Ismail et al (2010) 39 | 226 | -0.007 | -32,286 | The intervention is dominated by the comparator | 182 | | -0.007 | -26,000 | The intervention is dominated by the comparator | NO | | £20,000 | |
| 98 | Ismail et al (2010) 39 | 458 | 0.002 | 229,000 | The intervention is less cost-effective than the comparator | 550 | | 0.002 | 275,000 | The intervention is less cost-effective than the comparator | NO | | £20,000 | |
| 99 | Ismail et al (2010) 39 | 707 | 0.0002 | 3,535,000 | The intervention is less cost-effective than the comparator | 718 | | 0.0002 | 3,590,000 | The intervention is less cost-effective than the comparator | NO | | £20,000 | |
| 100 | Ismail et al (2010) 39 | 226 | -0.002 | -91,000 | The intervention is dominated by the comparator | 182 | | -0.002 | -91,000 | The intervention is dominated by the comparator | NO | | £20,000 | |
| 101 | Gschwend (2009) 37 | -854 | 0.47 | -1,817 | The intervention dominates the comparator | -10,545 | | 0.47 | -22,436 | The intervention dominates the comparator | NO | | Not determined | |
| 102 | Lindgren et al. (2007) 45 | 1,673 | 0.2 | 8,365 | The intervention is more cost-effective than the comparator | -1,853 | | 0.2 | -9,265 | The intervention dominates the comparator | NO, but when social costs are included, the intervention becomes cost-saving | | Not determined | |
| 103 | Valentine et al. (2006) 72 | 10,451 | 0.698 | 14,973 | The intervention is more cost-effective than the comparator | 5,763 | | 0.698 | 8,256 | The intervention is more cost-effective than the comparator | NO | | $50,000 | |
| 104 | Eddy et al. (2005) 63 | 22,737 | 0.159 | 143,000 | The intervention is less cost-effective than the comparator | 9,969 | | 0.159 | 62,698 | The intervention is more cost-effective than the comparator | YES | | $100,000 | |
| 105 | Herman et al. (2005) 67 | 635 | 0.57 | 1,114 | The intervention is more cost-effective than the comparator | 4,967 | | 0.57 | 8,714 | The intervention is more cost-effective than the comparator | NO | | £20,000 – 100,000 | |
| 106 | Herman et al. (2005) 67 | 3,922 | 0.13 | 30,169 | The intervention is more cost-effective than the comparator for low threshold values (<£30,170) | 3,748 | | 0.13 | 28,831 | The intervention is more cost-effective than the comparator for threshold values < £30,000 | NO | | £20,000 – 100,000 | |
| 107 | Rosen et al. (2005) 71 | -1,606 | 0.23 | -6,983 | The intervention dominates the comparator | -2,501 | | 0.23 | -10,874 | The intervention dominates the comparator | NO | | $20,000 | |
| 108 | The Diabetes Prevention Program Research Group (2003) 65 | 1,121 | 0.035 | 32,029 | The intervention is more cost-effective than the comparator | 1,829 | | 0.035 | 52,250 | The intervention is more cost-effective than the comparator | NO | | Not determined | |
| 109 | The Diabetes Prevention Program Research Group (2003) 65 | 1,635 | 0.016 | 102,164 | The intervention is less cost-effective than the comparator | 1,627 | | 0.016 | 101,713 | The intervention is less cost-effective than the comparator | NO | | Not determined | |
| 110 | Almbrand et al. (2000) 30 | 6,204 | 0.66 | 9,400 | The intervention is more cost-effective than the comparator | 15,906 | | 0.66 | 24,100 | The intervention is more cost-effective than the comparator | NO | | €60,000 | |
